# Supplementary material for: Dispersive solid-phase extraction of organophosphorus pesticides from apple, cucumber and water samples using reduced graphene oxide coated with ZnO nanocomposites as a sorbent
Source: Royal Society of Chemistry journal article supplement (doi:10.1039/c5ay00866b), 2015-01-01
Supplement: c5ay00866b1.pdf [file c5ay00866b1.pdf]

## Supporting information

### **Dispersive solid-phase extraction of organophosphorus pesticides from apple, cucumber and water samples using reduced graphene oxide coated with ZnO nanocomposites as sorbent**

Ting Sun,<sup>a</sup> Yongri Jin,<sup>a</sup> Jie Yang,<sup>a</sup> Lanjie Li,<sup>a</sup> Xiaolei Shi<sup>b\*</sup> and Xuwen Li<sup>a\*</sup>

<sup>a</sup> College of Chemistry, Jilin University, Jiefang street 2519, Changchun 130021, P. R. China.

<sup>b</sup> College of Quartermaster Technology, Jilin University, Xian Street 5333, Changchun 130062, P. R. China.

\* Corresponding author: Professor Xuwen Li, E-mail address: xwlii@jlu.edu.cn

Tel./fax: +86-431-85167996.; Professor Xiaolei Shi, E-mail address: xlshi@jlu.edu.cn

Table S1 Retention times, quantication and identification ions of the eight OPs pesticides

| Pesticides       | structure                                                                           | Molecular weight | Retention time (min) | Qualitative ion | Quantitative ion |
|------------------|-------------------------------------------------------------------------------------|------------------|----------------------|-----------------|------------------|
| Methamidophos    | 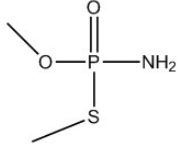   | 141              | 5.366                | 94              | 141,126, 94,79   |
| Dichlorvos       |    | 221              | 5.489                | 109             | 185,145,109,79   |
| Omethoate        |    | 213              | 7.986                | 156             | 156 ,126,110,79  |
| Dimethoate       |   | 229              | 9.242                | 87              | 143,125,93,87    |
| Methyl parathion |  | 263              | 11.480               | 109             | 263,125,109,79   |
| Malathion        |  | 330              | 12.539               | 173             | 173,158,127,93   |
| Chlorpyrifos     |  | 351              | 12.712               | 197             | 314,286,197,97   |
| Parathion        |  | 291              | 12.881               | 109             | 291,139,109,97   |
